# Supplementary material for: Rapid and selective electrochemical transformation of ammonia to N2 by substoichiometric TiO2-based electrochemical system
Source: Royal Society of Chemistry journal article supplement (doi:10.1039/c9ra07470h), 2020-01-01
Supplement: c9ra07470h1.pdf [file c9ra07470h1.pdf]

## Electronic Supplementary Information

### Rapid and selective electrochemical transformation of ammonia to N<sub>2</sub> by substoichiometric TiO<sub>2</sub>-based electrochemical system

Yanbiao Liu<sup>a,b,\*</sup>, Jiancheng Mei<sup>a</sup>, Chensi Shen<sup>a,b</sup>, Manhong Huang<sup>a,b</sup>, Ming Yang<sup>c</sup>, Zhiwei Wang<sup>b,d</sup>,  
Wolfgang Sand<sup>a,e</sup> and Fang Li<sup>a,b,\*</sup>

<sup>a</sup> *Textile Pollution Controlling Engineering Center of Ministry of Environmental Protection, College of Environmental Science and Engineering, Donghua University, 2999 North Renmin Road, Shanghai 201620, P. R. China.*

<sup>b</sup> *Shanghai Institute of Pollution Control and Ecological Security, 1239 Siping Road, Shanghai 200092, P. R. China.*

<sup>c</sup> *Key Laboratory of Cleaner Production and Integrated Resource Utilization of China National Light Industry, Beijing Technology and Business University, Beijing 100048, China.*

<sup>d</sup> *State Key Laboratory of Pollution Control and Resource Reuse, School of Environmental Science and Engineering, Tongji University, Shanghai 200092, China.*

<sup>e</sup> *Institute of Biosciences, Freiberg University of Mining and Technology, Freiberg 09599, Germany.*

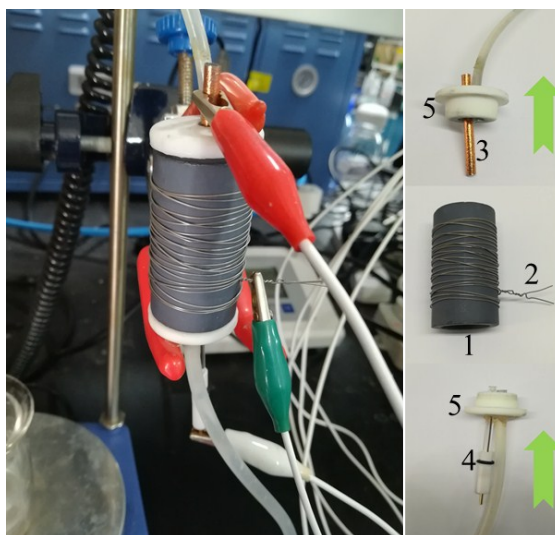

**Fig. S1** A digital photograph of the electrochemical system, including 1) a  $\text{Ti}_4\text{O}_7$  anode, 2) a Ti wire current collector, 3) a carbon rod cathode, 4) a saturated Ag/AgCl electrode, and 5) a silicone rubber.

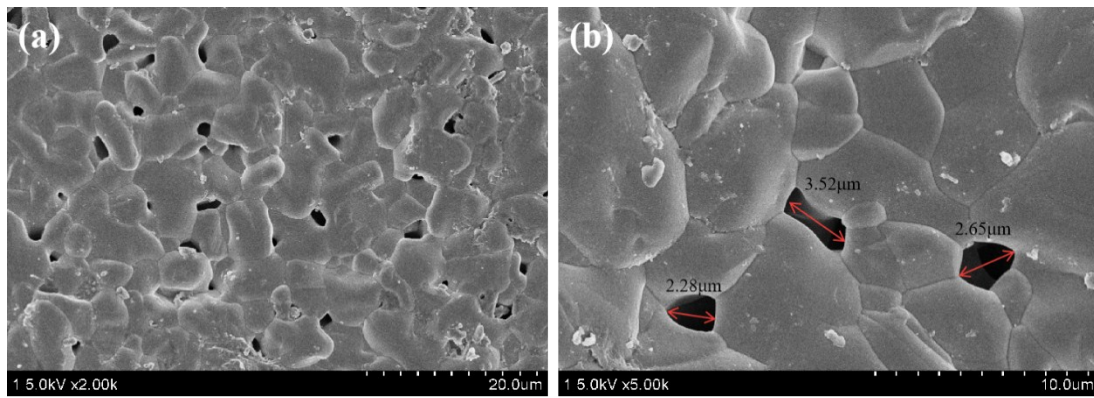

**Fig. S2** FESEM images (a, b) of a porous substoichiometric titanium dioxide ( $\text{Ti}_4\text{O}_7$ ) tubular electrode.

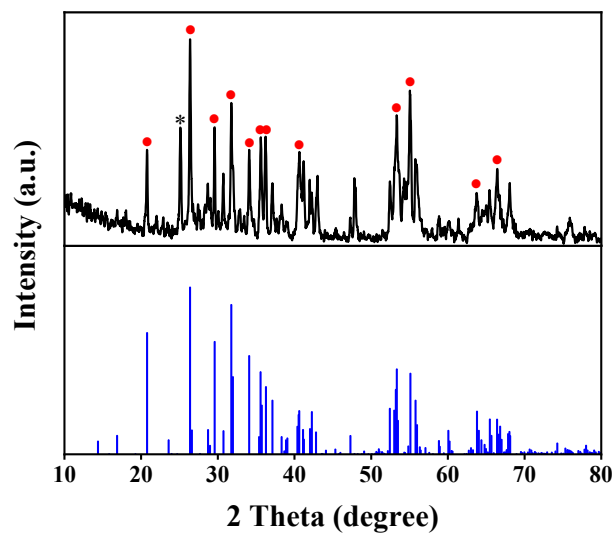

**Fig. S3** XRD data of Ebonex<sup>®</sup> tubular electrode.

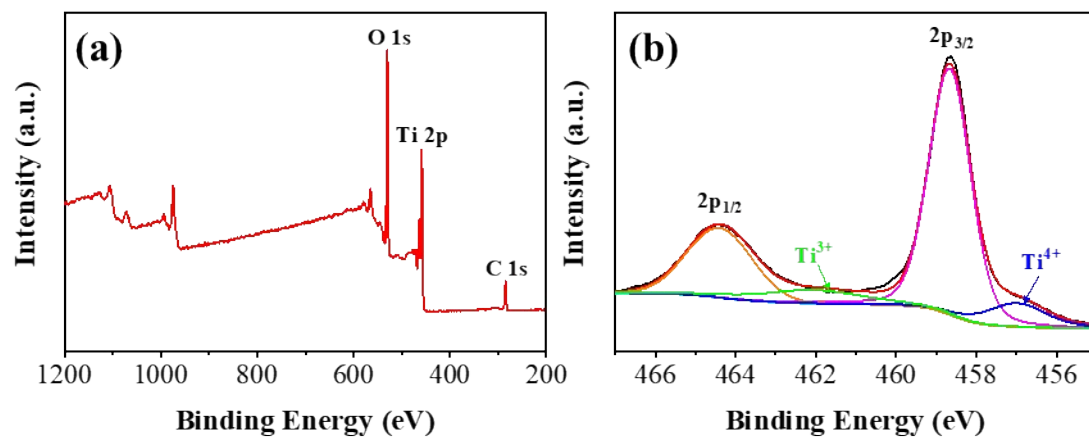

**Fig. S4** (a) The wide region scanning XPS spectrum of  $\text{Ti}_4\text{O}_7$  electrode. XPS spectra for the narrow scan of (b) Ti 2p on  $\text{Ti}_4\text{O}_7$  electrode.

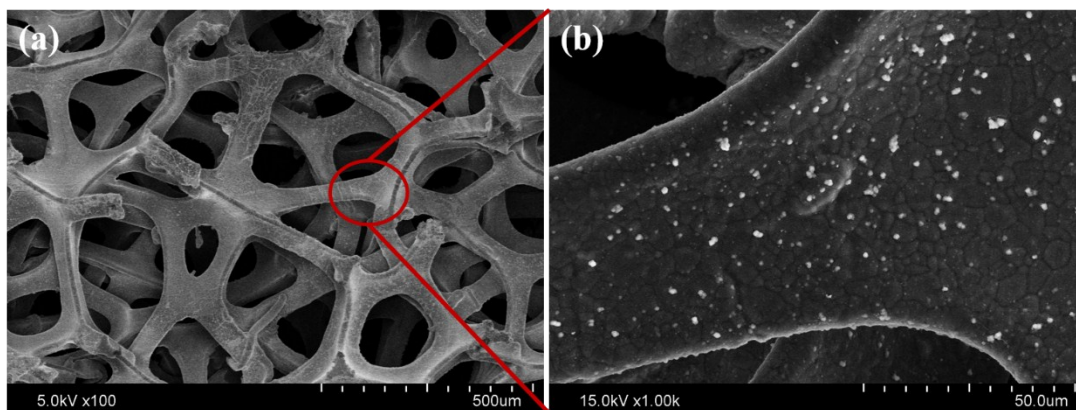

**Fig. S5** FESEM images (a, b) of the Pd/Cu-Ni foam electrode.

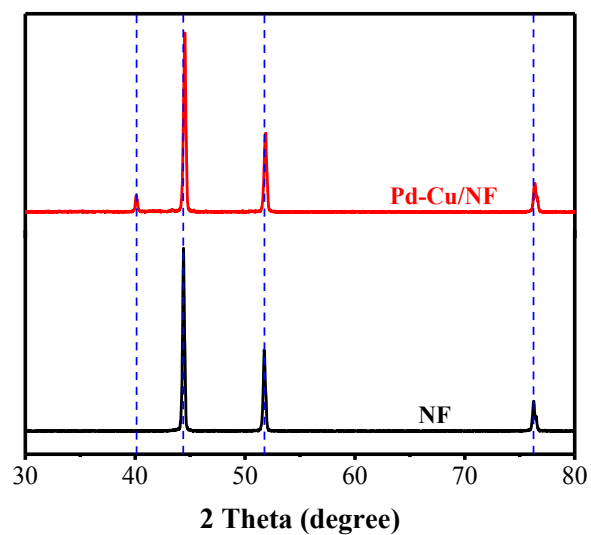

**Fig. S6** XRD patterns of the Pd–Cu/NF and NF electrodes.

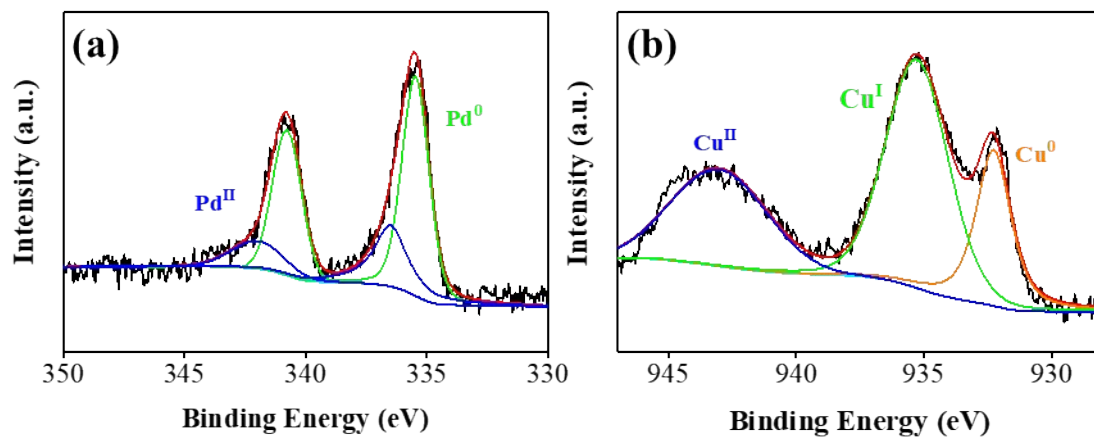

**Fig. S7** XPS spectra for the narrow scan of (a) Pd and (b) Cu of a fresh Pd-Cu/NF cathode.



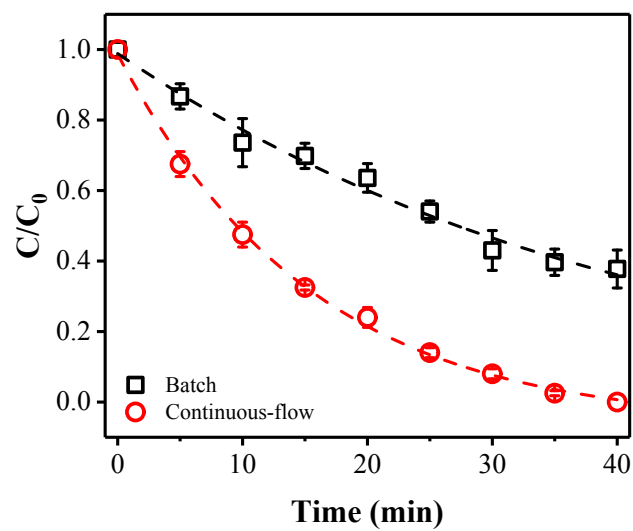

**Fig. S8** Comparison of ammonia conversion in batch and continuous-flow systems. Reaction conditions: anode potential of 3.0 V vs. Ag/AgCl,  $[Cl^-]$  of 0.12 M, and pH of 7.

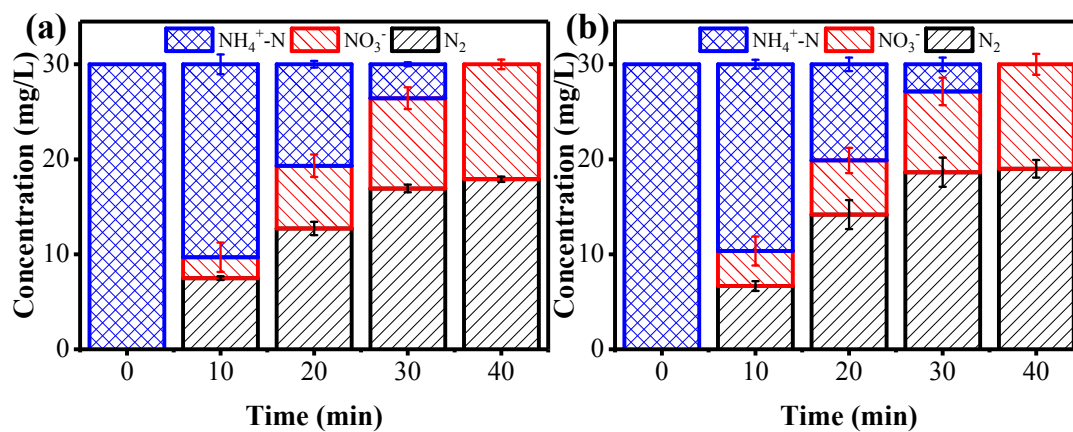

**Fig. S9** The conversion of ammonia in 40 min by employing different cathode materials: (a) Pd/NF, and (b) Cu/NF. Reaction conditions: anode potential of 3.0 V vs. Ag/AgCl,  $[\text{Cl}^-]$  of 0.12 M, flow rate of  $4 \text{ mL} \cdot \text{min}^{-1}$ , and pH of 7.

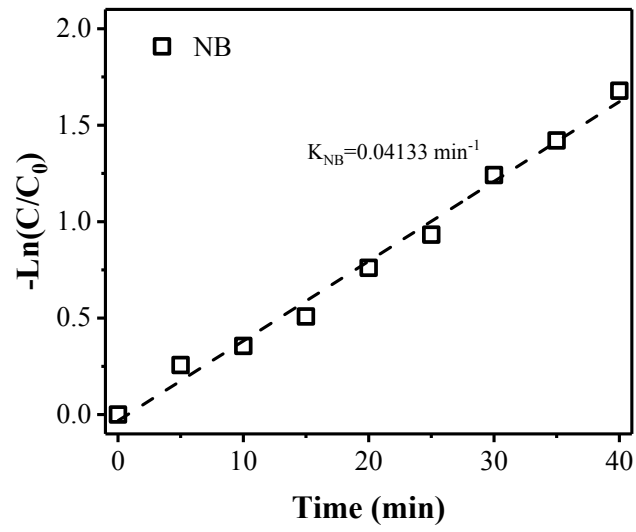

**Fig. S10** The plot of  $-\ln(C/C_0)$  versus time for the NB degradation.

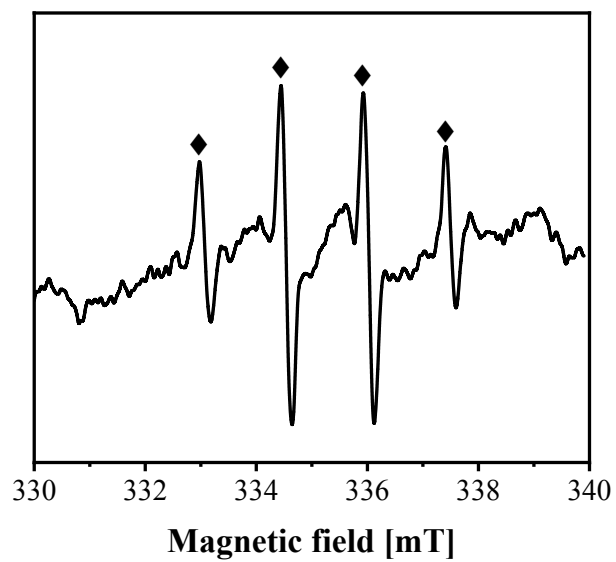

**Fig. S11** EPR spectra with DMPO observed from the flow-by experiment after 20 min at an applied anode potential of 3.0 V vs. Ag/AgCl.

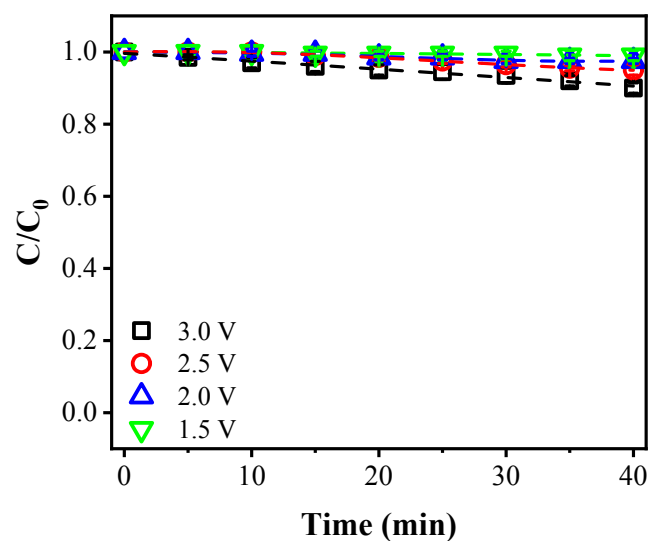

**Fig. S12** Conversion effect of ammonia with 0.12 M  $\text{Na}_2\text{SO}_4$  background electrolyte at different anode potential.

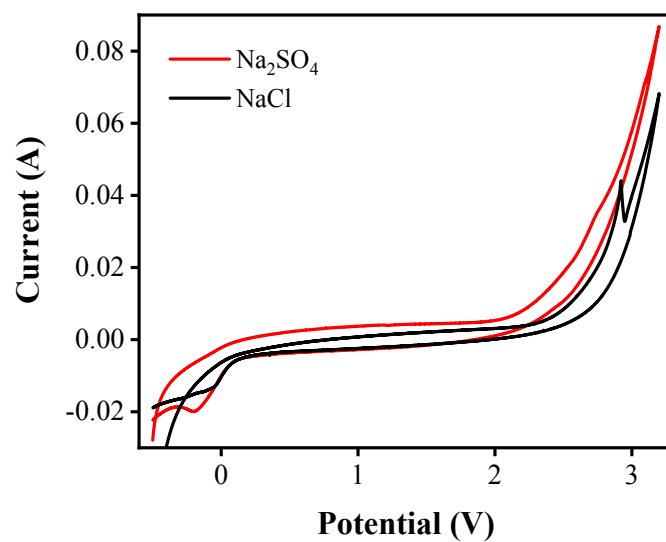

**Fig. S13** Cyclic voltammetry results in a 0.12 M NaCl or 0.12M  $\text{Na}_2\text{SO}_4$  background electrolyte. Scan rate = 20  $\text{mV s}^{-1}$ .

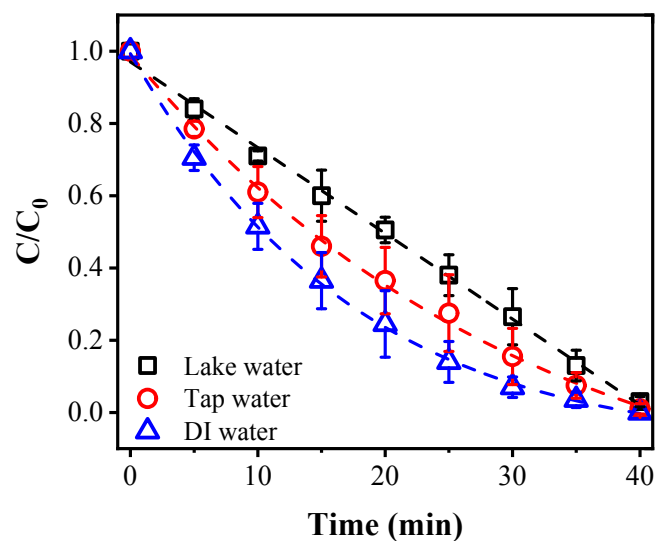

**Fig. S14** Impact of background solutions on the ammonia removal. Reaction conditions: ammonia of  $30 \text{ mg}\cdot\text{L}^{-1}$ , anode potential of  $3.0 \text{ V vs. Ag/AgCl}$ , flow rate of  $4 \text{ mL}\cdot\text{min}^{-1}$ ,  $[\text{Cl}^-]$  of  $0.12 \text{ M}$ , and pH of 7.

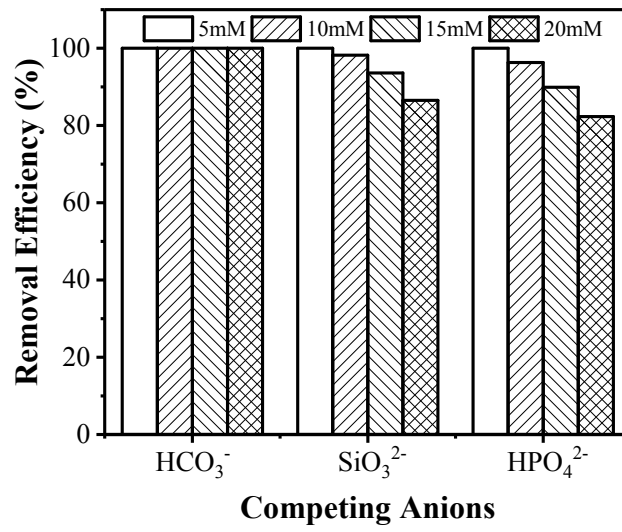

**Fig. S15** Effect of competing anions on ammonia conversion.



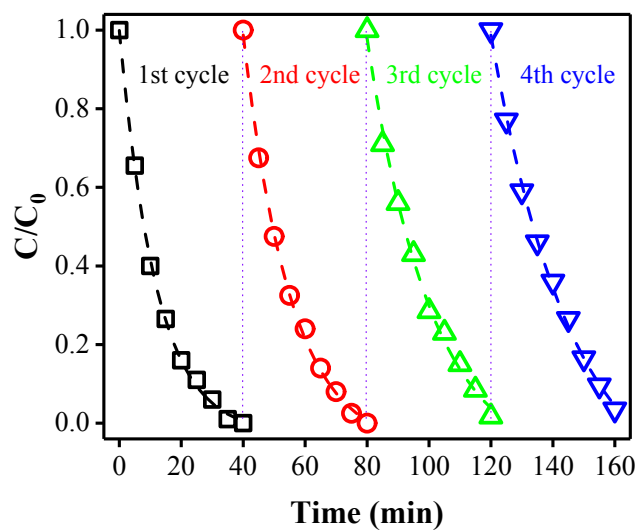

**Fig. S16** Comparison of ammonia conversion kinetics during four consecutive cycles. Reaction conditions: ammonia of  $30 \text{ mg}\cdot\text{L}^{-1}$ , anode potential of  $3.0 \text{ V}$  vs.  $\text{Ag}/\text{AgCl}$ , flow rate of  $4 \text{ mL}\cdot\text{min}^{-1}$ ,  $[\text{Cl}^-]$  of  $0.12 \text{ M}$ , and pH of 7.
